# Supplementary material for: Interstitial Arabidopsis-Type Telomeric Repeats in Asteraceae
Source: MDPI journal article supplement (doi:10.3390/plants10122794), 2021-12-17
Supplement: s1 [file s1]

Table S1. Distribution of ITR sites in Asteraceae and related families of Asterales. E: occurrence of extra chromosomes. +: presence. nr: not reported. <sup>1</sup> Each chromosome arm was divided into four regions according to Roa and Guerra (2012): centromeric (c), proximal (p), interstitial-proximal (ip), interstitial-terminal (it). <sup>2</sup> 1: This work; 2: Fuchs et al. (1995); 3: Houben et al. (1999); 4: Adams et al. (2001); 5: Borgen et al. (2003); 6: Pires et al. (2004); 7: Abd El-Twab and Kondo (2006); 8: Abd El-Twab and Kondo (2007); 9: Hanmoto et al. (2007); 10: Matoba et al. (2007); 11: Dydak et al. (2009); 12: García et al. (2009); 13: Matoba and Uchiyama (2009); 14: Shibata and Hizume (2011); 15: Li et al. (2012); 16: Cuyacot et al. (2016); 17: Cuyacot et al. (2017); 18: Mancía et al. (2017); 19: Rosato et al. (2018); 20: Mlinarec et al. (2019); 21: Abd El-Twab et al. (2009).

|                                                        | Subfamily   | Tribe       | Subtribe     | 2n | ITR site number | Location <sup>1</sup> | References <sup>2</sup> |
|--------------------------------------------------------|-------------|-------------|--------------|----|-----------------|-----------------------|-------------------------|
| <b>Asteraceae</b>                                      |             |             |              |    |                 |                       |                         |
| <i>Anthemis arvensis</i> L.                            | Asteroideae | Anthemideae | Anthemidinae | 18 | 0               | -                     | 1                       |
| <i>Anthemis cotula</i> L.                              |             |             |              | 18 | 2               | it                    | 1                       |
| <i>Anthemis maritima</i> L.                            |             |             |              | 36 | 0               | -                     | 1                       |
| <i>Anthemis rosularis</i> P. Fraga & Rosselló          |             |             |              | 18 | 0               | -                     | 1                       |
| <i>Anthemis tinctoria</i> L.                           |             |             |              | 18 | 3               | p, ip                 | 1                       |
| <i>Cota nigellifolia</i> (Boiss.) Alv. Fern. & Vitales |             |             |              | 18 | 52              | p, ip, it             | 1                       |
| <i>Gonospermum fruticosum</i> (Buch) Less.             |             |             |              | 18 | 29              | c, p, ip, it          | 1                       |
| <i>Tanacetum cinerariifolium</i> (Trevir.) Sch. Bip.   |             |             |              | 18 | 32              | c, p, ip, it          | 20                      |

|                                                                    |              |        |       |    |       |
|--------------------------------------------------------------------|--------------|--------|-------|----|-------|
| <i>Tanacetum parthenium</i> (L.) Sch. Bip.                         |              | 18     | 14, 0 | c  | 1; 4  |
| <i>Tanacetum ptarmiciflorum</i> Sch. Bip.                          |              | 18     | +     | nr | 5     |
| <i>Tanacetum vulgare</i> L.                                        |              | 18     | 2, 0  | ip | 1; 4  |
| <i>Artemisia bigelovii</i> A. Gray                                 | Artemisiinae | 18, 36 | 0     | -  | 12    |
| <i>Artemisia feddei</i> H. Lév. & Vanio                            |              | 16     | 0     | -  | 13    |
| <i>Artemisia keiskeana</i> Miq.                                    |              | 18     | 0     | -  | 13    |
| <i>Artemisia nova</i> A. Nelson                                    |              | 18, 36 | 0     | -  | 12    |
| <i>Artemisia princeps</i> Pamp.                                    |              | 34     | 0     | -  | 13    |
| <i>Artemisia tridentata</i> Nutt. subsp.<br><i>tridentata</i>      |              | 18, 36 | 0     | -  | 12    |
| <i>Artemisia tripartita</i> Rybd. subsp. <i>tripartita</i>         |              | 18, 36 | 0     | -  | 12    |
| <i>Artemisia vulgaris</i> L.                                       |              | 16     | 0     | -  | 1     |
| <i>Crossostephium artemisioides</i> Less.                          |              | 18     | 0     | -  | 14    |
| <i>Chrysanthemum lavandulifolium</i> (Fisch. ex<br>Trautv.) Makino |              | 18     | 0     | -  | 16    |
| <i>Chrysanthemum zawadskii</i> Herbich                             |              | 36, 54 | 0     | -  | 7; 17 |
| <i>Leucanthemella linearis</i> (Matsum. ex<br>Matsum.) Tzvelev     |              | 18     | 12    | i  | 8     |
| <i>Leucanthemella serotina</i> (L.) Tzvelev                        |              | 18     | 0     | -  | 1     |
| <i>Nipponanthemum nipponicum</i> (Franch. ex<br>Maxim.) Kitam.     |              | 18     | 0     | -  | 8; 14 |
| <i>Lasiospermum bipinnatum</i> (Thunb.) Druce                      | Athanasiinae | 18+2E  | 0     | -  | 1     |

|                                                                               |                 |        |                                                  |           |       |
|-------------------------------------------------------------------------------|-----------------|--------|--------------------------------------------------|-----------|-------|
| <i>Cotula socialis</i> Hilliard                                               | Cotulinae       | 18     | 0                                                | -         | 1     |
| <i>Argyranthemum broussonetii</i> (Pers.)<br>Humphries                        | Glebionidinae   | 18     | 0                                                | -         | 5     |
| <i>Argyranthemum haouarytheum</i><br>Humphries & Bramwell                     |                 | 18     | 0                                                | -         | 1     |
| <i>Argyranthemum frutescens</i> (L.) Sch. Bip.                                |                 | 18     | 0                                                | -         | 5     |
| <i>Argyranthemum lemsii</i> Humphries                                         |                 | 18     | 0                                                | -         | 5     |
| <i>Argyranthemum sundingii</i> L. Borgen                                      |                 | 18     | 0                                                | -         | 5     |
| <i>Glebionis coronaria</i> (L.) Cass. ex Spach                                |                 | 18     | 0                                                | -         | 1; 14 |
| <i>Glebionis segetum</i> (L.) Fourr.                                          |                 | 18     | +                                                | nr        | 15    |
| <i>Leucanthemum graminifolium</i> (L.) Lam.                                   | Leucanthemiinae | ca. 36 | 2                                                | ip        | 1     |
| <i>Mauranthemum ebusitanum</i> (Vogt) N.<br>Torres & Rosselló                 |                 | 18     | 0                                                | -         | 1     |
| <i>Rhodanthemum arundanum</i> (Boiss.) B. H.<br>Wilcox, K. Bremer & Humphries |                 | 18     | 0                                                | -         | 1     |
| <i>Achillea distans</i> Waldst. & Kit. ex Willd.                              | Matricariinae   | 54     | 0                                                | -         | 1     |
| <i>Achillea ligustica</i> All.                                                |                 | 18+1E  | 17                                               | c, p      | 1     |
| <i>Achillea maritima</i> (L.) Ehrend. & Y. P. Guo                             |                 | 18     | 0                                                | -         | 1     |
| <i>Achillea millefolium</i> L.                                                |                 | 54     | 0                                                | -         | 21    |
| <i>Anacyclus atlanticus</i> Litard. & Maire                                   |                 | 18     | 6, 8, 17<br>0, 2, 3,<br>4, 6, 8,<br>9, 12,<br>14 | p, ip, it | 19    |
| <i>Anacyclus clavatus</i> (Desf.) Pers.                                       |                 |        |                                                  |           | 19    |
| <i>Anacyclus homogamos</i> (Maire) Humphries                                  |                 | 18     | 0                                                | -         | 19    |

|                                                                                |                |    |                            |           |    |
|--------------------------------------------------------------------------------|----------------|----|----------------------------|-----------|----|
| <i>Anacyclus linearilobus</i> Boiss. & Reuter                                  |                | 18 | 19                         | p, ip     | 19 |
| <i>Anacyclus maroccanus</i> (Ball) Ball                                        |                | 18 | 0                          | -         | 19 |
| <i>Anacyclus monanthos</i> (L.) Thell.                                         |                | 18 | 0, 4                       | p         | 19 |
| <i>Anacyclus pyrethrum</i> (L.) Link                                           |                | 18 | 26, 30,<br>45              | p, ip, it | 19 |
| <i>Anacyclus radiatus</i> Loisel. subsp. <i>coronatus</i><br>(Murb.) Humphries |                | 18 | 0                          | -         | 19 |
| <i>Anacyclus radiatus</i> Loisel. subsp. <i>radiatus</i><br>(Murb.) Humphries  |                | 18 | 0                          | -         | 19 |
| <i>Anacyclus valentinus</i> L.                                                 |                | 18 | 0, 2, 3,<br>4, 5, 6,<br>10 | p, ip, it | 19 |
| <i>Matricaria chamomilla</i> L.                                                |                | 18 | +                          | nr        | 14 |
| <i>Chamaemelum nobile</i> (L.) All.                                            | Santolininae   | 18 | 0                          | -         | 1  |
| <i>Cladanthus arabicus</i> (L.) Cass.                                          |                | 18 | 0                          | -         | 1  |
| <i>Cladanthus scariosus</i> (Ball) Oberpr. & Vogt                              |                | 18 | 12                         | p, ip, it | 1  |
| <i>Ursinia speciosa</i> DC.                                                    | Ursiinae       | 16 | 0                          | -         | 1  |
| <i>Lonas annua</i> (L.) Vines & Druce                                          | incertae sedis | 18 | 0                          | -         | 1  |
| <i>Senecio vulgaris</i> L.                                                     | Senecioneae    | 40 | 2                          | p         | 1  |
| <i>Brachyscome dichromosomatica</i> C. R.<br>Carter                            | Astereae       | 4  | 0                          | -         | 3  |
| <i>Erigeron acer</i> L.                                                        |                | 18 | 0                          | -         | 1  |
| <i>Erigeron karvinskianus</i> DC.                                              |                | 36 | 0                          | -         | 1  |

|                                                              |                   |    |      |    |      |
|--------------------------------------------------------------|-------------------|----|------|----|------|
| <i>Heterotheca villosa</i> (Pursh) Shinnery                  |                   | 18 | 0    | -  | 1    |
| <i>Symphyotrichum nova-belgii</i> (L.) G. L. Nesom           |                   | 48 | 0    | -  | 1    |
| <i>Xanthisma gracile</i> (Nutt.) D. R. Morgan & R. L. Hartm. |                   | 4  | 4, 0 | it | 2; 9 |
| <i>Xanthisma texanum</i> DC.                                 |                   | 8  | 0    | -  | 1    |
| <i>Bellium crassifolium</i> Moris                            | Bellidinae        | 18 | 0    | -  | 1    |
| <i>Noticastrum diffusum</i> (Pers.) Cabrera                  | Chrysopsidinae    | 18 | 0    | -  | 1    |
| <i>Felicia tenella</i> (L.) Nees                             | Homochrominae     | 18 | 0    | -  | 1    |
| <i>Grindelia chiloensis</i> (Cornel.) Cabrera                | Machaerantherinae | 12 | 0    | -  | 1    |
| <i>Coreopsis gigantea</i> (Kellogg) H. M. Hall               | Coreopsideae      | 24 | 0    | -  | 1    |
| <i>Cosmos bipinnatus</i> Cav.                                |                   | 24 | 0    | -  | 1    |
| <i>Dahlia merckii</i> Lehm.                                  |                   | 36 | 0    | -  | 1    |
| <i>Liatris spicata</i> (L.) Willd.                           | Eupatorieae       | 20 | 0    | -  | 1    |
| <i>Anaphalis margaritacea</i> (L.) Benth. & Hook. f.         | Gnaphalieae       | 28 | 0    | -  | 1    |
| <i>Pycnosorus globosus</i> F. L. Bauer ex Benth.             |                   | 20 | 0    | -  | 1    |
| <i>Helenium aromaticum</i> (Hook.) L. H. Bailey              | Helenieae         | 34 | 0    | -  | 1    |
| <i>Hymenoxys hoopesii</i> (A.Gray) Bierner                   | Tetraneurinae     | 30 | 0    | -  | 1    |

|                                                  |             |            |    |   |   |   |
|--------------------------------------------------|-------------|------------|----|---|---|---|
| <i>Echinacea purpurea</i> (L.) Moench            | Heliantheae |            | 22 | 0 | - | 1 |
| <i>Helianthus annuus</i> L.                      |             |            | 34 | 0 | - | 2 |
| <i>Iva xanthiifolia</i> Nutt.                    |             |            | 36 | 0 | - | 1 |
| <i>Lindheimera texana</i> A. Gray & Engelm.      |             |            | 16 | 0 | - | 1 |
| <i>Silphium perfoliatum</i> L.                   |             |            | 14 | 0 | - | 1 |
| <i>Synedrella nodiflora</i> (L.) Gaertn.         |             |            | 36 | 0 | - | 1 |
| <i>Tithonia rotundifolia</i> (Mill.) S. F. Blake |             |            | 34 | 0 | - | 1 |
| <i>Xanthium italicum</i> Moretti                 |             |            | 36 | 0 | - | 1 |
| <i>Schkuhria pinnata</i> (Lam.) Kuntze ex Thell. |             | Bahieae    | 20 | 0 | - | 1 |
| <i>Guizotia abyssinica</i> (L. f.) Cass.         |             | Millerieae | 30 | 0 | - | 1 |
| <i>Melampodium</i> sp.                           |             |            | 24 | 0 | - | 1 |
| <i>Tridax trilobata</i> (Cav.) Hemsl.            |             |            | 20 | 0 | - | 1 |
| <i>Chiliadenus glutinosus</i> (L.) Fourr.        | Inuleae     | Inulinae   | 16 | 0 | - | 1 |
| <i>Dittrichia viscosa</i> (L.) Greuter           |             |            | 18 | 0 | - | 1 |
| <i>Inula helenium</i> L.                         |             |            | 20 | 0 | - | 1 |
| <i>Pallenis spinosa</i> (L.) Cass.               |             |            | 10 | 0 | - | 1 |
| <i>Perralderia pau</i> Font Quer                 |             | Plucheinae | 18 | 0 | - | 1 |
| <i>Arnica sachalinensis</i> (Regel) A. Gray      | Madieae     | Arnicinae  | 38 | 0 | - | 1 |

|                                                            |                 |              |           |        |    |       |   |
|------------------------------------------------------------|-----------------|--------------|-----------|--------|----|-------|---|
| <i>Madia sativa</i> Molina                                 |                 |              | Madiinae  | 32     | 4  | it    | 1 |
| <i>Flaveria trinervia</i> (Spreng.) C. Mohr                |                 | Tageteae     |           | 36     | 0  | -     | 1 |
| <i>Porophyllum ruderale</i> (Jacq.) Cass.                  |                 |              |           | 68     | 8  | p, ip | 1 |
| <i>Barnadesia spinosa</i> L.                               | Barnadesioideae | Barnadesieae |           | 50     | 0  | -     | 1 |
| <i>Chuquiraga jussieui</i> J.F. Gmel.                      |                 |              |           | ca. 54 | 0  | -     | 1 |
| <i>Arctium lappa</i> L.                                    | Carduoideae     | Cardueae     | Carduinae | 36     | 0  | -     | 1 |
| <i>Carduus nigrescens</i> Vill. subsp. <i>assoi</i> Willk. |                 |              |           | 20+3E  | 0  | -     | 1 |
| <i>Cirsium vulgare</i> (Savi) Ten.                         |                 |              |           | 68     | 0  | -     | 1 |
| <i>Cynara scolymus</i> L.                                  |                 |              |           | 34     | 0  | -     | 1 |
| <i>Galactites tomentosa</i> Moench                         |                 |              |           | 20     | 10 | c     | 1 |
| <i>Jurinea ledebourii</i> Bunge                            |                 |              |           | 36     | 0  | -     | 1 |
| <i>Onopordum acaulon</i> L.                                |                 |              |           | 34     | 0  | -     | 1 |
| <i>Onopordum tauricum</i> Willd.                           |                 |              |           | 34     | 0  | -     | 1 |
| <i>Ptilostemon gnaphaloides</i> Soják                      |                 |              |           | 32     | 0  | -     | 1 |
| <i>Silybum marianum</i> (L.) Gaertn.                       |                 |              |           | 34     | 0  | -     | 1 |
| <i>Staelina dubia</i> L.                                   |                 |              |           | 30     | 0  | -     | 1 |
| <i>Xeranthemum annuum</i> L.                               |                 |              |           | 12     | 0  | -     | 1 |

|                                                                                        |              |    |   |       |       |
|----------------------------------------------------------------------------------------|--------------|----|---|-------|-------|
| <i>Carlina hispanica</i> Lam.                                                          | Carlinae     | 18 | 6 | c, ip | 1     |
| <i>Carduncellus monspelliensium</i> All.                                               | Centaureinae | 48 | 0 | -     | 1     |
| <i>Carthamus balearicus</i> (J.J. Rodr.) Greuter                                       |              | 24 | 0 | -     | 1     |
| <i>Carthamus tinctorius</i> L.                                                         |              | 24 | 0 | -     | 1; 18 |
| <i>Centaurea jacea</i> L.                                                              |              | 44 | 0 | -     | 11    |
| <i>Centaurea montana</i> L.                                                            |              | 44 | 0 | -     | 1     |
| <i>Centaurea nigra</i> L.                                                              |              | 22 | 0 | -     | 1     |
| <i>Centaurea phrygia</i> L.                                                            |              | 22 | 0 | -     | 11    |
| <i>Centaurea oxylepis</i> (Wimm. & Grab.)<br>Hayek                                     |              | 44 | 0 | -     | 11    |
| <i>Centaurea seridis</i> L.                                                            |              | 33 | 0 | -     | 1     |
| <i>Cheirolophus canariensis</i> (Brouss. ex<br>Willd.) Holub subsp. <i>canariensis</i> |              | 30 | 0 | -     | 1     |
| <i>Cheirolophus canariensis</i> subsp.<br><i>subexpinnata</i> (Burch.) G. Kunkel       |              | 30 | 0 | -     | 1     |
| <i>Cheirolophus webbianus</i> (Sch. Bip.) Holub                                        |              | 30 | 0 | -     | 1     |
| <i>Klasea nudicaulis</i> (L.) Fourr.                                                   |              | 30 | 0 | -     | 1     |
| <i>Klasea pinnatifida</i> (Cav.) Talavera                                              |              | 30 | 0 | -     | 1     |
| <i>Lamottea diania</i> (Webb) G. López                                                 |              | 24 | 0 | -     | 1     |
| <i>Mantiscalca salmantica</i> (L.) Briq. & Cavill.                                     |              | 22 | 0 | -     | 1     |

|                                                                                 |               |            |              |    |    |          |   |
|---------------------------------------------------------------------------------|---------------|------------|--------------|----|----|----------|---|
| <i>Rhaponticum coniferum</i> (L.) Greuter                                       |               |            |              | 26 | 0  | -        | 1 |
| <i>Echinops ritro</i> L.                                                        |               |            | Echinopsinae | 32 | 0  | -        | 1 |
| <i>Echinops sphaerocephalus</i> L.                                              |               |            |              | 30 | 0  | -        | 1 |
| <i>Arctotis venusta</i> Norl.                                                   | Cichorioideae | Cichorieae | Arctotidinae | 18 | 0  | -        | 1 |
| <i>Arctotheca calendula</i> (L.) Levyns                                         |               |            |              | 18 | 0  | -        | 1 |
| <i>Dymondia margaretae</i> Compton                                              |               |            |              | 18 | 2  | p        | 1 |
| <i>Cichorium intybus</i> L.                                                     |               |            | Cichoriinae  | 18 | 0  | -        | 1 |
| <i>Tolpis barbata</i> (L.) Gaertn.                                              |               |            |              | 18 | 0  | -        | 1 |
| <i>Crepis capillaris</i> (L.) Wallr.                                            |               |            | Crepidinae   | 6  | 0  | -        | 2 |
| <i>Crepis triasii</i> (Cambess.) Fr.                                            |               |            |              | 8  | 0  | -        | 1 |
| <i>Taraxacum</i> sp.                                                            |               |            |              | 24 | 0  | -        | 1 |
| <i>Andryala integrifolia</i> L.                                                 |               |            | Hieraciinae  | 18 | 0  | -        | 1 |
| <i>Hyoseris radiata</i> L.                                                      |               |            | Hyoseridinae | 16 | 14 | c, p, ip | 1 |
| <i>Hyoseris taurina</i> (Pamp.) Martinoli                                       |               |            |              | 16 | 18 | c, p     | 1 |
| <i>Reichardia picroides</i> (L.) Roth                                           |               |            |              | 14 | 0  | -        | 1 |
| <i>Sonchus masguindalii</i> Pau & Font Quer                                     |               |            |              | 18 | 0  | -        | 1 |
| <i>Sonchus tenerrimus</i> L. subsp. <i>dianae</i><br>(Lacaita ex Willk.) Malag. |               |            |              | 14 | 0  | -        | 1 |

|                                                                |                 |      |    |       |       |
|----------------------------------------------------------------|-----------------|------|----|-------|-------|
| <i>Sonchus tenerrimus</i> L. subsp. <i>tenerrimus</i>          |                 | 14   | 2  | ip    | 1     |
| <i>Helminthotheca echioides</i> (L.) Holub                     | Hypochaeridinae | 10   | 8  | ip    | 1     |
| <i>Leontodon hispidus</i> L.                                   |                 | 14   | 0  | -     | 2     |
| <i>Leontodon longirostris</i> (Finch & P. D. Sell)<br>Talavera |                 | 8    | 10 | ip,it | 1     |
| <i>Leontodon tuberosus</i> L.                                  |                 | 8+2E | 2  | p     | 1     |
| <i>Urospermum dalechampii</i> (L.) Scop. ex F.<br>W. Schmidt   |                 | 14   | 0  | -     | 1     |
| <i>Urospermum picroides</i> (L.) Scop. ex F. W.<br>Schmidt     |                 | 10   | 0  | -     | 1     |
| <i>Lactuca saligna</i> L.                                      | Lactuceae       | 18   | 0  | -     | 10    |
| <i>Lactuca sativa</i> L.                                       |                 | 18   | 0  | -     | 10    |
| <i>Lactuca serriola</i> L.                                     |                 | 18   | 0  | -     | 1; 10 |
| <i>Lactuca virosa</i> Habl.                                    |                 | 18   | 0  | -     | 10    |
| <i>Launaea arborescens</i> (Batt.) Murb.                       |                 | 14   | 0  | -     | 1     |
| <i>Launaea cervicornis</i> (Boiss.) Font Quer &<br>Rothm.      |                 | 18   | 0  | -     | 1     |
| <i>Catananche caerulea</i> L.                                  | Scolyminae      | 18   | 0  | -     | 1     |
| <i>Scorzonera laciniata</i> Jacq.                              | Scorzonerinae   | 14   | 0  | -     | 1     |
| <i>Tragopogon dubius</i> Scop.                                 |                 | 12   | 0  | -     | 1; 6  |

|                                                      |                 |              |         |    |        |   |
|------------------------------------------------------|-----------------|--------------|---------|----|--------|---|
| <i>Tragopogon miscellus</i> Ownbey                   |                 |              | 24      | 0  | -      | 6 |
| <i>Tragopogon mirus</i> Ownbey                       |                 |              | 24      | 0  | -      | 6 |
| <i>Tragopogon pratensis</i> L.                       |                 |              | 12      | 0  | -      | 6 |
| <i>Tragopogon porrifolius</i> L.                     |                 |              | 12      | 0  | -      | 6 |
| <i>Stokesia laevis</i> (Hill) Greene                 | Vernonieae      | Stokesiinae  | 14      | 4  | ip, it | 1 |
| <i>Vernonia fasciculata</i> Michx.                   |                 | Vernoniinae  | 34      | 0  | -      | 1 |
| <i>Gymnarrhena micrantha</i> Desf.                   | Gymnarhenoideae | Gymnarheneae | 20      | 10 | p, ip  | 1 |
| <i>Chaetanthera microphylla</i> (Cass.) Hook. & Arn. | Mutisioideae    | Mutisieae    | 24      | 0  | -      | 1 |
| <i>Chaptalia arechavaletae</i> Arechav.              |                 |              | ca. 100 | 0  | -      | 1 |
| <i>Chaptalia exscapa</i> (Pers.) Baker               |                 |              | 100     | 0  | -      | 1 |
| <i>Leibnitzia anandria</i> (L.) Turcz.               |                 |              | 46      | 0  | -      | 1 |
| <i>Mutisia coccinea</i> A. St.-Hil.                  |                 |              | 52      | 0  | -      | 1 |
| <i>Nassauvia serpens</i> d'Urv.                      |                 | Naussavieae  | 22      | 0  | -      | 1 |
| <i>Nassauvia sprengelioides</i> DC.                  |                 |              | 44      | 4  | ip     | 1 |
| <i>Proustia pyrifolia</i> DC.                        |                 |              | 52      | 0  | -      | 1 |
| <i>Trixis californica</i> Kellogg                    |                 |              | 54      | 0  | -      | 1 |
| <i>Onoseris alata</i> Rusby                          |                 | Onoserideae  | ca. 46  | 0  | -      | 1 |

**Calyceraceae**

|                               |    |   |   |   |
|-------------------------------|----|---|---|---|
| <i>Calycera herbacea</i> Cav. | 42 | 0 | - | 1 |
|-------------------------------|----|---|---|---|

**Campanulaceae**

|                          |    |   |   |    |
|--------------------------|----|---|---|----|
| <i>Lobelia erinus</i> L. | 28 | 0 | - | 14 |
|--------------------------|----|---|---|----|

**Goodeniaceae**

|                                               |    |   |   |    |
|-----------------------------------------------|----|---|---|----|
| <i>Goodenia fascicularis</i> F. Muell. & Tate | 16 | 0 | - | 1  |
| <i>Leschenaultia formosa</i> R. Br.           | nr | 0 | - | 14 |

**Stylidaceae**

|                                   |    |   |   |    |
|-----------------------------------|----|---|---|----|
| <i>Candollea debilis</i> F. Muell | nr | 0 | - | 14 |
|-----------------------------------|----|---|---|----|
