# Supplementary material for: Interstitial Arabidopsis-Type Telomeric Repeats in Asteraceae
Source: MDPI journal article supplement (doi:10.3390/plants10122794), 2021-12-17
Supplement: s1 [file s1]

**Table S2.** List of studied accessions and sources of analysed material by FISH. Seeds from wild origins accessed from personal recollections and research institutions are indicated [Inés Alvaréz (IA), Vicente Colomer (VC), Leopoldo de Simone (LdS), Elena Estrelles (EE), Pere Fraga (PF), Ana Ibars (AI), Javier Fabado (JF), Antonio Galán (AGM), Alexis J. Maravilla (AJMA), Gonzalo Nieto Feliner (GNF), Josefa Prieto (JP), Jesús Riera (JR), Marcela Rosato (MR), Josep A. Rosselló (JAR)] and research institutions [Botanischer Garten Bielefeld (BEILF); Botanischer Garten Berlin-Dahlem (BGB-D); Botanischer Garten der Johannes Gutenberg-Universität Mainz (MJG); Botanischer Garten der Universität Leipzig (LZ); Botanischer Garten der Universität Potsdam (POTSD); Botanical Garden of Teplice (TEBLI); Centro para la Investigación y Experimentación Forestal (CIEF); Civico Orto Botanico di Trieste (TSM); Conservatoire et Jardin Botaniques Gèneve (CJB); Denver Botanic Gardens (KHD), Jardí Botànic de Barcelona (BC); Jardín Botánico Canario Viera y Clavijo (JBCVC); Jardin Botanique de Clermont-Ferrand (CLER); Jardí Botànic Marimurtra (BLAN); Jardí Botànic de la Universitat de València (VAL); Millennium Seed Bank (MSB); Real Jardín Botánico de Madrid (RJB-CSIC); Research Institute of Forests and Rangelands (RIFR); Siberian Botanical Garden Tomsk State University (TK); Universitatea de Medicină și Farmacie din Târgu Mureș] (UMFST).

| Taxon                                                  | Origin                                                                    | Source<br>(accession number) | Voucher        |
|--------------------------------------------------------|---------------------------------------------------------------------------|------------------------------|----------------|
| <i>Achillea distans</i> Waldst. & Kit. ex Willd.       | RO-0-B-0380603. Romania, Hunedoara, P National Retezat (Bot. Garten Iasi) | BGB-D                        | BRL 530        |
| <i>A. ligustica</i> All.                               | IT-0-B-2530203. Italy, Toscana, Monti Pisani, Santallago                  | BGB-D                        | BRL 531        |
| <i>A. maritima</i> (L.) Ehrend. & Y.P.Guo              | Spain, Valencia, Saler. <i>AJMA</i>                                       | VAL (247532)                 |                |
| <i>Anaphalis margaritacea</i> (L.) Benth. & Hook.f.    | XX-0-LZ-AN-47-2010                                                        | LZ                           | JBVAL-CE 2798  |
| <i>Andryala integrifolia</i> L.                        | Spain, Valencia, Algemesí. <i>AJMA</i>                                    | VAL                          | JBVAL-CE C2862 |
| <i>Anthemis arvensis</i> L.                            | XX-0-LZ-SYS-26-2011                                                       | LZ                           | JBVAL-CE C2799 |
| <i>A. cotula</i> L.                                    | GR-0-B-2403992. Greece, Makedonien, Nomos                                 | BGB-D                        | BRL 551        |
| <i>A. maritima</i> L.                                  | Spain, Balearic Islands, Menorca. <i>PF</i>                               | VAL                          | JBVAL-CE C2863 |
| <i>A. rosularis</i> P.Fraga & Rosselló                 | Spain, Balearic Islands, Menorca. <i>PF</i>                               | VAL                          | JBVAL-CE C2864 |
| <i>A. tinctoria</i> L.                                 | unknown                                                                   | VAL (C 25)                   | JBVAL-CE C2865 |
| <i>Arctium lappa</i> L.                                | CHOG-20170054                                                             | CJB ( 1060)                  | JBVAL-CE 2730  |
| <i>Arctotheca calendula</i> (L.) Levyns                | XX-0-MJG-199704110                                                        | MJG (120)                    | JBVAL-CE C2866 |
| <i>Arctotis venusta</i> Norl.                          | unknown                                                                   | TEBLI (without number)       | JBVAL-CE C2867 |
| <i>Argyranthemum haouarytheum</i> Humphries & Bramwell | Spain, Canary Islands, Gran Canaria                                       | JBCVC (PFN33)                | JBVAL-CE C2868 |
| <i>Arnica sachalinensis</i> (Regel) A.Gray             | unknown                                                                   | BEILF (55)                   | JBVAL-CE 2778  |
| <i>Artemisia vulgaris</i> L.                           | unknown                                                                   | VAL (4419-90)                | JBVAL-CE C2869 |

|                                                                        |                                                                          |                      |                |
|------------------------------------------------------------------------|--------------------------------------------------------------------------|----------------------|----------------|
| <i>Barnadesia spinosa</i> L.                                           | Ecuador, Quito, cultivated at Museum of Pumapungo. <i>GNF</i>            | RJB-CSIC             | 4981GN         |
| <i>Bellium crassifolium</i> Moris                                      | unknown                                                                  | VAL (44-99)          | JBVAL-CE C2872 |
| <i>Calycera herbacea</i> Cav.                                          | Chile                                                                    | Commercial accession | JBVAL-CE C2969 |
| <i>Carduncellus monspeliensis</i> St.-Lag                              | Spain, Valencia, Alzira, La Casella. <i>AJMA</i>                         | VAL (241078)         | JBVAL-CE C2873 |
| <i>Carduus nigrescens</i> subsp. <i>assoi</i> Willk.                   | Spain, Valencia, Teresa de Cofrentes, Cuesta Vallart. <i>MR &amp; VC</i> | VAL (241075)         | JBVAL-CE C2874 |
| <i>Carlina hispanica</i> Lam.                                          | Spain, Valencia, Jarafuel, Barranco del Agua. <i>MR &amp; VC</i>         | VAL                  | JBVAL-CE-C2995 |
| <i>Carthamus balearicus</i> (J.J. Rodr.) Greuter                       | Spain, Balearic Islands, Menorca                                         | VAL (27-97)          | JBVAL-CE-C2997 |
| <i>C. tinctorius</i> L.                                                | unknown                                                                  | TSM (without number) | JBVAL-CE C2875 |
| <i>Catananche caerulea</i> L.                                          | Spain, Valencia, Alzira, PNM La Murta. <i>AJMA</i>                       | VAL (241094)         | JBVAL-CE C2876 |
| <i>Centaurea montana</i> L.                                            | unknown                                                                  | RJB-CSIC             | ES-0-MA-00409  |
| <i>C. nigra</i> L.                                                     | unknown                                                                  | RJB-CSIC             | ES-0-MA-00410  |
| <i>C. seridis</i> L.                                                   | unknown                                                                  | VAL (2146-90)        | JBVAL-CE C2877 |
| <i>Chaetanthera microphylla</i> (Cass.) Hook. & Arn.                   | Chile                                                                    | Commercial accession | JBVAL-CE C2951 |
| <i>Chamaemelum nobile</i> (L.) All.                                    | unknown                                                                  | CLER (2709)          | JBVAL-CE C2878 |
| <i>Chaptalia arechavaletae</i> Arechav.                                | XX-0-B-0633174                                                           | BGB-D (482, 541)     | JBVAL-CE C2879 |
| <i>Chaptalia exscapa</i> (Pers.) Baker                                 | Chile                                                                    | Comercial accession  | JBVAL-CE C2952 |
| <i>Cheirolophus canariensis</i> (Brouss. ex Willd.) Holub              | Spain, Canary Islands, Tenerife, Teno- ES-0-B-0840385                    | BGB-D (482, 542)     | JBVAL-CE-C2987 |
| <i>C. canariensis</i> subsp. <i>subexpinnatus</i> (Burchard) G. Kunkel | Spain, Barcelona, JBB. N12503                                            | BC (1712)            | JBVAL-CE-C2986 |
| <i>C. webbianus</i> (Sch.Bip.) Holub                                   | Spain, Barcelona, JBB. N12481                                            | BC (1714)            | JBVAL-CE-C2988 |
| <i>Chiliadenus glutinosus</i> (L.) Fourn.                              | Spain, Valencia, Liria, Cotó del Català                                  | CIEF (V662)          | JBVAL-CE C2904 |
| <i>Chuquiraga jussieui</i> J.F. Gmel.                                  | Ecuador, Quito, Cruz Loma, Rucu Pinchincha route. <i>GNF</i>             | RJB-CSIC             | 4982GN         |
| <i>Cichorium intybus</i> L.                                            | Spain, Valencia, Algemesí. <i>AJMA</i>                                   | VAL                  | JBVAL-CE C2880 |
| <i>Cirsium vulgare</i> (Savi) Ten.                                     | Spain, Valencia, Algemesí. <i>AJMA</i>                                   | VAL                  | JBVAL-CE C2881 |
| <i>Cladanthus arabicus</i> (L.) Cass.                                  | unknown                                                                  | CLER (2715)          | JBVAL-CE C2882 |
| <i>C. scariosus</i> (Ball) Oberpr. & Vogt                              | Morocco, Imlil, Toubkal National Park                                    | RJB-CSIC             | IA 2352        |
| <i>Coreopsis gigantea</i> (Kellog) H.M. Hall                           | unknown                                                                  | VAL (244b)           | JBVAL-CE C2884 |
| <i>Cosmos bipinnatus</i> Cav.                                          | unknown                                                                  | RJB-CSIC             | ES-0-MA-00501  |
| <i>Cota nigellifolia</i> (Boiss.) Alv. Fern. & Vitales                 | Iran, Kermanshah, Bisoton Mozaffarian                                    | RIFR                 | TARI 83549     |
| <i>Cotula socialis</i> Hilliard                                        | unknown                                                                  | TEBLI                | JBVAL-CE C2883 |
| <i>Crepis triasii</i> (Cambess.) Fr.                                   | Spain, Balearic Islands, Mallorca                                        | VAL (328-9)          | JBVAL-CE C2885 |
| <i>Cynara scolymus</i> L.                                              | unknown                                                                  | RJB-CSIC             | ES-0-MA-00547  |
| <i>Dahlia merckii</i> Lehm.                                            | XX-0-MJG-199709202                                                       | MJG (150)            | JBVAL-CE C2886 |

|                                                |                                                                                |                     |                |
|------------------------------------------------|--------------------------------------------------------------------------------|---------------------|----------------|
| <i>Dittrichia viscosa</i> (L.) Greuter         | Spain, Valencia, Simat de la Valldigna, Font del Cirer                         | CIEF (V1052)        | JBVAL-CE C2887 |
| <i>Dymondia margaretae</i> Compton             | unknown                                                                        | VAL (241091)        | JBVAL-CE C2888 |
| <i>Echinacea purpurea</i> (L.) Moench          | unknown                                                                        | TK (58)             | JBVAL-CE C2889 |
| <i>Echinops ritro</i> L.                       | Spain, Valencia, Bicorp, Rio Fraile. <i>MR &amp; VC</i>                        | VAL (241076)        | JBVAL-CE C2890 |
| <i>E. sphaerocephalus</i> L.                   | Spain, Lleida, Cornellana. N13461                                              | BC (1860)           | JBVAL-CE C2891 |
| <i>Erigeron acer</i> L.                        | CHOG-20171874                                                                  | CJB (1081)          | JBVAL-CE 2733  |
| <i>E. karvinskianus</i> DC.                    | unknown                                                                        | VAL (241087)        | JBVAL-CE C2892 |
| <i>Felicia tenella</i> (L.) Nees               | XX-0-HAL-2889 2013-0478                                                        | POTSD (0565)        | JBVAL-CE 2757  |
| <i>Flaveria trinervia</i> (Spreng.) C. Mohr    | XX-0-MJG-199709209                                                             | MJG (155)           | JBVAL-CE C2893 |
| <i>Galactites tomentosa</i> Moench             | Spain, Valencia, Alzira. <i>AJMA</i>                                           | VAL<br>VAL (241081) | JBVAL-CE C2894 |
| <i>Glebionis coronaria</i> (L.) Cass. ex Spach | Spain, Valencia, La Pobla de Vallbona, Parc Cap de l'horta. <i>MR &amp; VC</i> |                     | JBVAL-CE C2895 |
| <i>Gonospermum fruticosum</i> (Buch) Less.     |                                                                                | JBCVC (4675/B)      | JBVAL-CE C2896 |
| <i>Goodenia fascicularis</i> F. Muell. & Tate  | Spain, Canary Islands, Tenerife, Costa de Acentejo, La Victoria                |                     |                |
| <i>Grindelia chilensis</i> (Cornel.) Cabrera   | unknown                                                                        | MSB (0086860)       | JBVAL-CE C2897 |
| <i>Gymnarrhena micrantha</i> Desf.             | Argentina                                                                      | UMFST (114)         | JBVAL-CE 2836  |
| <i>Guizotia abyssinica</i> (L.f.) Cass.        | unknown                                                                        | MSB (0416278)       | JBVAL-CE C2898 |
| <i>Helenium aromaticum</i> (Hook.) L.H.Bailey  | XX-0-HOH-SYS-13367                                                             | LZ                  | JBVAL-CE 2803  |
| <i>Helminthotheca echioides</i> (L.) Holub.    | unknown                                                                        | VAL ( 241089)       | JBVAL-CE C2899 |
| <i>Heterotheca villosa</i> (Pursh) Shinnars    | unknown                                                                        | VAL                 | JBVAL-CE C2922 |
|                                                | Canada, British Columbia, Nelson, Cranbrook. CA-0-B-2008004                    | BGB-D (482, 620)    | JBVAL-CE-C2989 |
| <i>Hymenoxys hoopesii</i> (A.Gray) Bierner     | unknown                                                                        | KHD (61)            | JBVAL-CE C2901 |
| <i>Hyoseris radiata</i> L.                     | XX-0-MJG-200307020                                                             | MJG (167)           | JBVAL-CE C2902 |
| <i>H. taurina</i> (Pamp.) Martinoli            | Italy, Sicilia, Capo Gallo. <i>LdS</i>                                         | VAL                 | JBVAL-CE C2903 |
| <i>Inula helenium</i> L.                       | unknown                                                                        | RJB-CSIC            | ES-0-MA-00777  |
| <i>Iva xanthiifolia</i> Nutt.                  | XX-0-LZ-AD-261-2006                                                            | LZ                  | JBVAL-CE 2804  |
| <i>Jurinea ledebourii</i> Bunge                | Nursery of JBB. N16972                                                         | BC (3918)           | JBVAL-CE C2905 |
| <i>Klasea nudicaulis</i> (L.) Fourr.           | Spain, Teruel, Valdeconejos. N15801                                            | BC (2358)           | JBVAL-CE C2931 |
| <i>K. pinnatifida</i> (Cav.) Talavera          | Spain, Valencia, Valencia, Alzira. <i>AJMA</i>                                 | VAL (241096)        | JBVAL-CE C2906 |
| <i>Lactuca serriola</i> L.                     | Spain, Valencia, Algemesí. <i>AJMA</i>                                         | VAL                 | JBVAL-CE C2907 |
| <i>Lamottea diania</i> (Webb) G. López         | unknown                                                                        | VAL (241093)        | JBVAL-CE C2908 |
| <i>Lasiospermum bipinnatum</i> (Thunb.) Druce  | XX-0-MJG-199707712                                                             | MJG (174)           | JBVAL-CE C2909 |
| <i>Launaea arborescens</i> (Batt.) Murb.       | Spain, Almeria. <i>MR</i>                                                      | VAL                 | JBVAL-CE C2910 |

|                                                                           |                                                                                                 |                                  |                  |
|---------------------------------------------------------------------------|-------------------------------------------------------------------------------------------------|----------------------------------|------------------|
| <i>Launaea cervicornis</i> (Boiss.) Font Quer & Rothm.                    | unknown                                                                                         | VAL (07-2016                     | JBVAL-CE-C2990   |
| <i>Leibnitzia anandria</i> (L.) Turcz.                                    | XX-0-POTSD-1999-0158                                                                            | POTSD (0578)                     | JBVAL-CE 2759    |
| <i>Leontodon longirostris</i> (Finch & P.D. Sell) Talavera                | Spain, Benifato, Serra d'Aitana, Partagat. <i>JR &amp; JF</i>                                   | VAL                              | JBVAL-CE C2911   |
| <i>L. tuberosus</i> L.                                                    | unknown                                                                                         | VAL (241085, 4258-90)            | JBVAL-CE C2912   |
| <i>Leucanthemella serotina</i> (L.) Tzvelev                               | unknown                                                                                         | BEILF (189)                      | JBVAL-CE 2784    |
| <i>Leucanthemum graminifolium</i> (L.) Lam.                               | unknown                                                                                         | RJB-CSIC                         | ES-0-MA-00828    |
| <i>Liatris spicata</i> (L.) Willd.                                        | unknown                                                                                         | BEILF (193)                      | JBVAL-CE 2786    |
| <i>Lindheimera texana</i> A. Gray & Engelm.                               | XX-0-MJG-19--46780                                                                              | MJG (179)                        | JBVAL-CE C2913   |
| <i>Lonas annua</i> (L.) Vines & Druce                                     | XX-0-MJG-19--46790                                                                              | MJG (180)                        | JBVAL-CE C2914   |
| <i>Madia sativa</i> Molina                                                | XX-0-MJG-19--62730                                                                              | TEBLI (77)                       | JBVAL-CE C2915   |
| <i>Mantisalca salmantica</i> (L.) Briq. & Cavill.                         | Spain, Valencia, Alzira, PNM La Murta. <i>AJMA</i>                                              | VAL (241095)                     | JBVAL-CE C2916,  |
| <i>Mauranthemum ebusitanum</i> (Vogt) N. Torres & Rosselló                | Spain, Balearic Islands, Eivissa, Puig d'en Serra. <i>JAR</i>                                   | VAL                              | JBVAL-CE C2917   |
| <i>Melampodium</i> sp.                                                    | XX-0-MJG-19--46810                                                                              | MJG (184)                        | JBVAL-CE C2918   |
| <i>Mutisia coccinea</i> A.St.-Hil.                                        | unknown                                                                                         | BLAN (without number)            | JBVAL-CE C2919   |
| <i>Nassauvia serpens</i> d'Urv.                                           | unknown                                                                                         | MSB (0451923)                    | JBVAL-CE C2920   |
| <i>N. sprengelioides</i> DC.                                              | Chile                                                                                           | Commercial accession             | JBVAL-CE C2964   |
| <i>Noticastrum diffusum</i> (Pers.) Cabrera                               | Argentina, Buenos Aires, S. Tandil, S. del Tigre. AR-0-B-1210497                                | BGB-D (482, 686)                 | JBVAL-CE-C2991   |
| <i>Onopordum acaulon</i> L.                                               | Spain, Valencia, Teresa de Cofrentes, Cuesta Vallart. <i>MR &amp; VC</i>                        | VAL                              | JBVAL-CE C2921   |
| <i>O. tauricum</i> Willd.                                                 | unknown                                                                                         | RJB-CSIC                         | ES-0-MA-00986    |
| <i>Onoseris alata</i> Rusby                                               | McAlpin s/n; cultivated in Las Cruces Research Station and Wilson Botanical Garden (Costa Rica) | Jeff Barter 59-883 (Hawaii, USA) | JBVAL-CE-C2992   |
| <i>Pallenis spinosa</i> (L.) Cass.                                        | Spain, Valencia, Jarafuel, Cañadilla. <i>MR &amp; VC</i>                                        | VAL                              | JBVAL-CE C2871   |
| <i>Perralderia paui</i> Font Quer                                         | Morocco, Fés-Meknés, Taza, Tizi-Ouazli. MA-0-B-0990417                                          | BGB-D (482, 701)                 | JBVAL-CE-C2993   |
| <i>Porophyllum ruderales</i> (Jacq.) Cass.                                | XX-0-TEBLI-01292                                                                                | TEBLI (79)                       | JBVAL-CE C2923   |
| <i>Proustia pyrifolia</i> DC.                                             | Chile                                                                                           | Commercial accession             | JBVAL-CE C2968   |
| <i>Ptilostemon gnaphaloides</i> Soják                                     | unknown                                                                                         | VAL ( 241092, 209-99)            | JBVAL-CE C2924   |
| <i>Pycnosorus globosus</i> F.L. Bauer ex Benth.                           | unknown                                                                                         | VAL (247-14)                     | JBVAL-CE C2925   |
| <i>Reichardia picroides</i> (L.) Roth                                     | Spain, Xàbia, Playa de la Barraca. <i>AI, JP, EE</i>                                            | VAL                              | JBVAL-BG-62B2017 |
| <i>Rhaponticum coniferum</i> (L.) Greuter                                 | Spain, Valencia, Jarafuel, Campillo. <i>MR &amp; VC</i>                                         | VAL                              | JBVAL-CE C2926   |
| <i>Rhodanthemum arundanum</i> (Boiss.) B.H. Wilcox, K. Bremer & Humphries | Morocco, Fés-Meknès, Boulmane, Outat El Haj. MA-0-B-0990717                                     | BGB-D (482, 737)                 | JBVAL-CE C2927   |
| <i>Schkuhria pinnata</i> (Lam.) Kuntze ex Thell.                          | XX-0-MJG-200403211                                                                              | MJG (198)                        | JBVAL-CE C2928   |

|                                                          |                                                                        |                       |                |
|----------------------------------------------------------|------------------------------------------------------------------------|-----------------------|----------------|
| <i>Scorzonera laciniata</i> Jacq.                        | Spain, Alicante, Villena. <i>AJMA</i>                                  | VAL                   | JBVAL-CE C2929 |
| <i>Senecio vulgaris</i> L.                               | Spain, Valencia, Algemesí. <i>AJMA</i>                                 | VAL                   | JBVAL-CE C2930 |
| <i>Silphium perfoliatum</i> L.                           | unknown                                                                | VAL (241083, 1204-90) | JBVAL-CE C2932 |
| <i>Silybum marianum</i> (L.) Gaertn.                     | unknown                                                                | VAL (470-15)          | JBVAL-CE C2933 |
| <i>Sonchus masguindalii</i> Pau & Font Quer              |                                                                        | BGB-D (482, 786)      | JBVAL-CE-C2996 |
|                                                          | Spain, Canary Islands, Tenerife, Anaga-Gebirge. ES-0-B-0411200         |                       |                |
| <i>S. tenerrimus</i> L. subsp. <i>tenerrimus</i>         | Spain, Murcia, Lorca. <i>AJMA</i>                                      | VAL                   | VAL-242610     |
| <i>S. tenerrimus</i> subsp. <i>dianae</i> Malag.         | Spain, Alicante, Xàbia. <i>AJMA</i> & <i>MR</i>                        | VAL                   | JBVAL-CE-C2994 |
| <i>Staezelina dubia</i> L.                               | Spain, Tarragona, Mas de la Franqueta. N13264                          | BC (1752)             | JBVAL-CE C2934 |
| <i>Stokesia laevis</i> (Hill) Greene                     | XX-0-MJG-19--46970                                                     | MJG (206 )            | JBVAL-CE C2935 |
| <i>Symphyotrichum novi-belgii</i> (L.) G.L. Nesom.       | unknown                                                                | VAL (74-97)           | JBVAL-CE C2870 |
| <i>Synedrella nodiflora</i> (L.) Gaertn.                 | XX-0-MJG-199703910                                                     | MJG (208)             | JBVAL-CE C2936 |
| <i>Tanacetum parthenium</i> (L.) Sch. Bip.               | unknown                                                                | BEILF (320)           | JBVAL-CE 2789  |
| <i>T. vulgare</i> L.                                     | Humboldt-Univ. Berlin. DE-0-B-0201195                                  | BGB-D                 | BRL 891        |
| <i>Taraxacum</i> sp.                                     | Spain, Zamora, Fuentesauco. <i>AGM</i>                                 | VAL (247533)          |                |
| <i>Tithonia rotundifolia</i> (Mill.) S.F. Blake          | XX-0-MJG-19--39420                                                     | MJG (217 )            | JBVAL-CE C2937 |
| <i>Tolpis barbata</i> (L.) Gaertn.                       | XX-0-LZ-AD-250-2006                                                    | LZ                    | JBVAL-CE 2808  |
| <i>Tragopogon dubius</i> Scop.                           | Spain, Valencia, Alzira. <i>AJMA</i>                                   | VAL                   | JBVAL-CE C2938 |
| <i>Tridax trilobata</i> (Cav.) Hemsl.                    | XX-0-MJG-19--47550                                                     | MJG (221)             | JBVAL-CE C2939 |
| <i>Trixis californica</i> Kellogg                        | unknown                                                                | MSB (0095990)         | JBVAL-CE C2940 |
| <i>Urospermum dalechampii</i> (L.) Scop. ex F.W. Schmidt | Spain, Valencia, Algemesí. <i>AJMA</i>                                 | VAL                   | JBVAL-CE C2941 |
| <i>U. picroides</i> (L.) Scop. ex F.W. Schmidt           | Spain, Valencia, Algemesí. <i>AJMA</i>                                 | VAL                   | JBVAL-CE C2942 |
| <i>Ursinia speciosa</i> DC.                              | XX-0-NCY-20080016G                                                     | TEBLI (96)            | JBVAL-CE C2943 |
| <i>Vernonia fasciculata</i> Michx.                       | XX-0-TEBLI-00842                                                       | TEBLI (98)            | JBVAL-CE C2944 |
| <i>Xanthisma texanum</i> DC.                             | XX-0-MJG-201301703                                                     | MJG (228)             | JBVAL-CE C2945 |
| <i>Xanthium italicum</i> Moretti                         | Spain, Valencia, Algemesí. <i>AJMA</i>                                 | VAL                   | JBVAL-CE C2946 |
| <i>Xeranthemum annuum</i> L.                             |                                                                        | MJG (231)             | JBVAL-CE C2947 |
|                                                          | UKR, Yampil'sky, Vinnytsia, Vilshanka river valley. UA-0-MJG-201011234 |                       |                |
